# Supplementary material for: Towards bottom-up nanopatterning of Prussian blue analogues
Source: publisher site journal article supplement (doi:10.3762/bjnano.5.204), 2014-10-31
Supplement: Additional file 1 [file 2190-4286-5-204-S1.pdf]

## **Supporting Information**

for

### **Towards bottom-up nanopatterning of Prussian blue analogues**

Virgile Trannoy<sup>1</sup>, Marco Faustini<sup>2</sup>, David Grosso<sup>2</sup>, Sandra Mazerat<sup>1</sup>, François Brisset<sup>1</sup>,  
Alexandre Dazzi<sup>3</sup> and Anne Bleuzen\*<sup>1</sup>

Address: <sup>1</sup>Institut de Chimie Moléculaire et des Matériaux d'Orsay, UMR CNRS 8182,  
Université Paris-Sud, 15 rue Georges Clémenceau, 91405 Orsay Cedex, France,

<sup>2</sup>Laboratoire de Chimie de la Matière Condensée de Paris, Université Pierre et Marie  
Curie-Paris 6 and CNRS Collège de France, 11 place Berthelot 75231 Paris, France and

<sup>3</sup>Laboratoire de Chimie Physique, UMR CNRS 8000, Université Paris-Sud, 15 avenue  
Jen Perrin, 91405 Orsay Cedex, France

Email: Anne Bleuzen\* - [anne.bleuzen@u-psud.fr](mailto:anne.bleuzen@u-psud.fr)

\* Corresponding author

### **Additional experimental data**

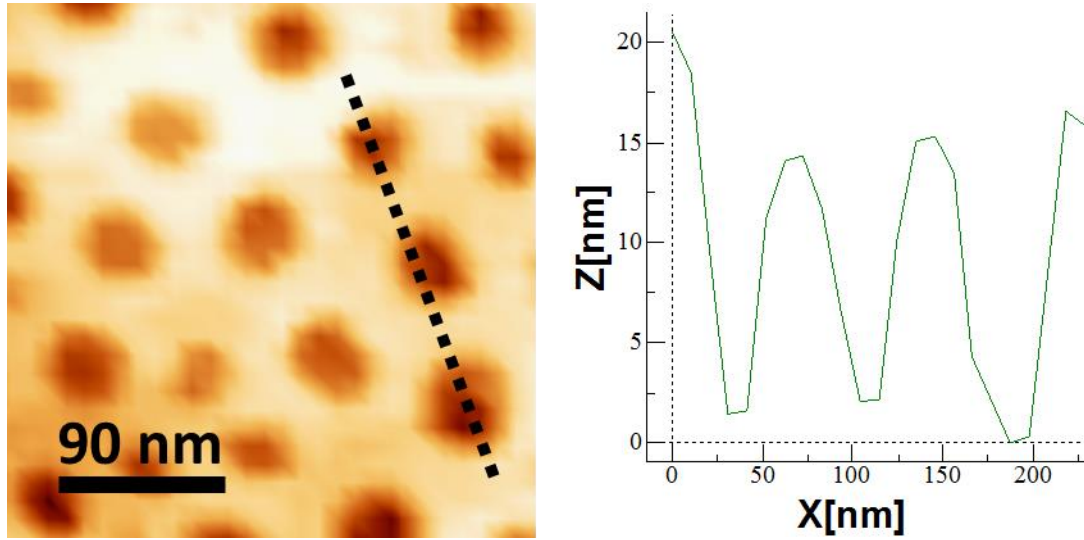

**Figure S1:** AFM image in a dark area of the sample **Au10NC** and height profile along the dotted line. The height maxima correspond to the top of the TiO<sub>2</sub> film and the minima to the bottom of the craters. The height of the film is around 15 nm. The distance between two adjacent perforations is around 80 nm.

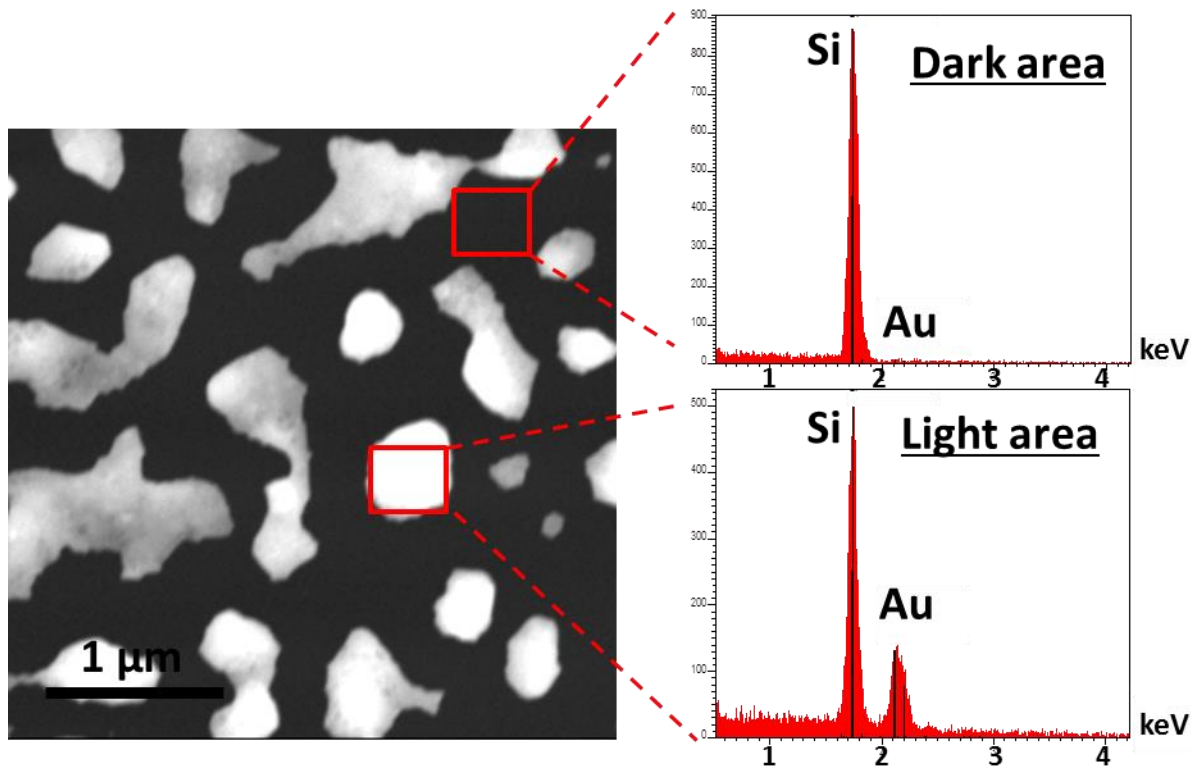

**Figure S2:** SEM image of the sample **Au10NC** and EDX analyses in a dark area and in a light area (No band corresponding to the Ti element is expected on this energy range).

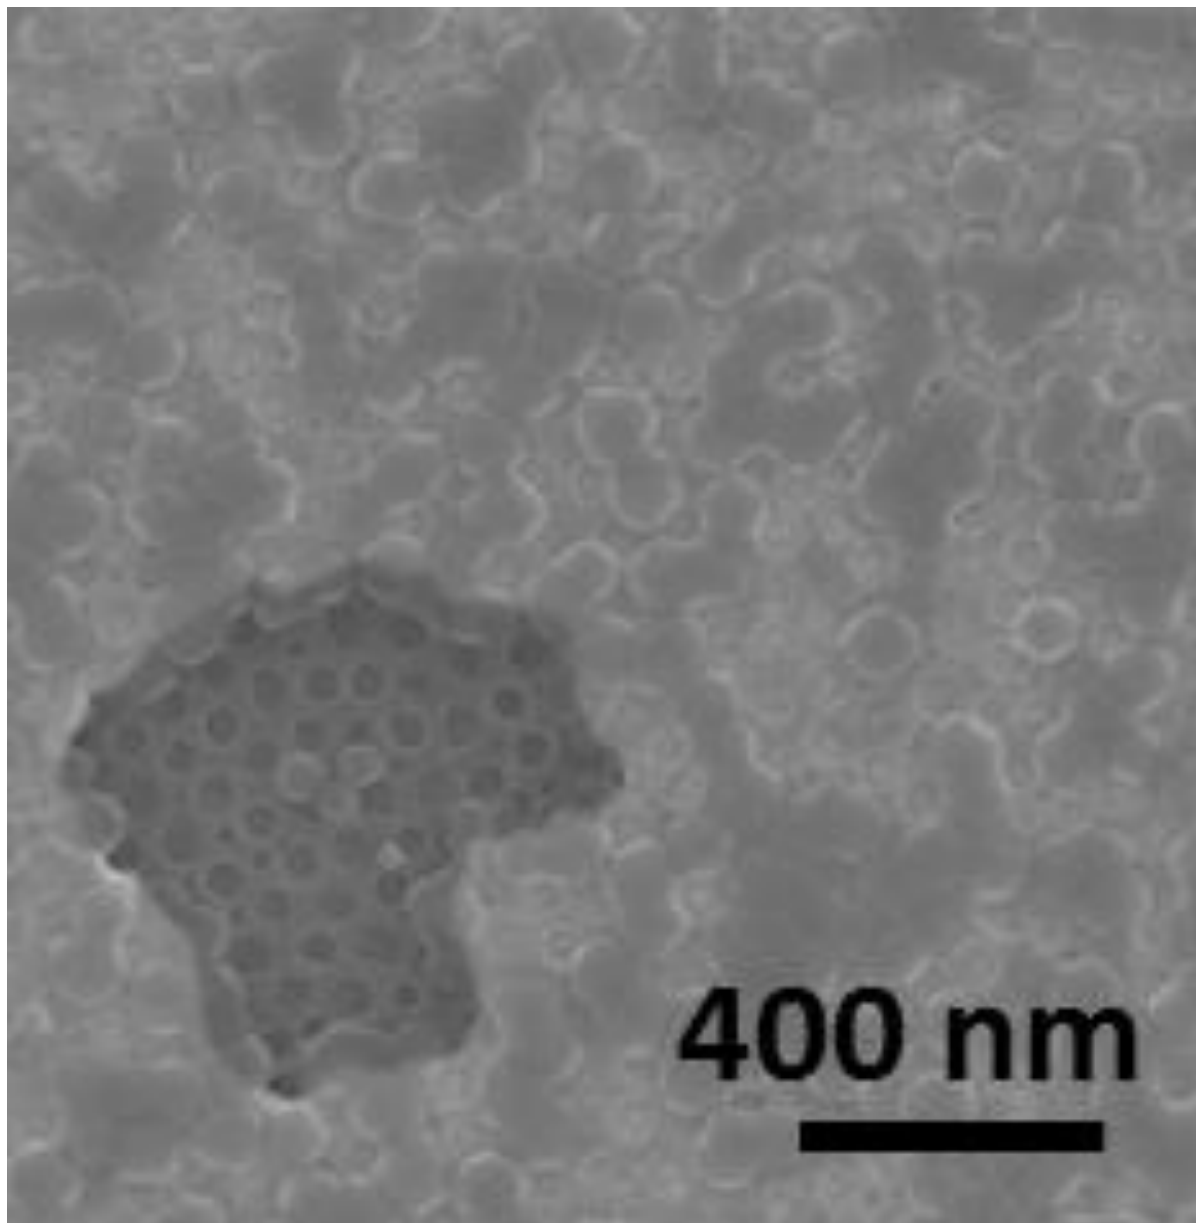

**Figure S3:** SEM images of a  $\text{TiO}_2/\text{PBA}$  nanocomposite perform with an in-Lens detector working at 5 kV and at a short working distance (WD) equal to 2.7 mm. PBA particles appear as protuberances sticking out of the nanoporations in the bright zone containing the gold layer.
